# Supplementary material for: Identification of Micro Ribonucleic Acids and Their Targets in Response to Plasmodiophora brassicae Infection in Brassica napus
Source: Front Plant Sci. 2021 Oct 28;12:734419. doi: 10.3389/fpls.2021.734419 (PMC8585624; doi:10.3389/fpls.2021.734419)
Supplement: Supplementary file 3 [file Table_3.XLSX]

## Sheet: Sheet1
Supplementary Table S3 | Overview of degradome sequencing data.
Sample	Mock409R		Int409R		Mock409S		Int409S		Sum
	number	ratio	number	ratio	number	ratio	number	ratio	number	ratio
Raw Reads	24987299	/	29406667	/	28282360	/	29093770	/	111770096	/
reads < 15nt after removing 3 adaptor	104336	0.42%	116575	0.40%	90504	0.32%	72326	0.25%	383741	0.34%
Mappable Reads	24882963	99.58%	29290092	99.60%	28191856	99.68%	29021444	99.75%	111386355	99.66%
Unique Raw Reads	9036599	/	10475985	/	8782570	/	7116665	/	24103454	/
Unique reads < 15nt after removing 3 adaptor	44113	0.49%	51049	0.49%	41279	0.47%	34511	0.48%	116192	0.48%
Unique Mappable Reads	8992486	99.51%	10424936	99.51%	8741291	99.53%	7082154	99.52%	23987262	99.52%
Transcript Mapped Reads	19188983	76.79%	20904034	71.09%	17483228	61.82%	12370614	42.52%	69946859	62.58%
Unique Transcript Mapped Reads	6952900	76.94%	8042954	76.78%	6381113	72.66%	5198952	73.05%	16835828	69.85%
Number of input Transcript	123295	/	123295	/	123295	/	123295	/	123295	/
Number of Coverd Transcript	103555	83.99%	104090	84.42%	102817	83.39%	100775	81.73%	109796	89.05%
